# Supplementary material
Source: publisher figshare collection journal article supplement (https://acs.figshare.com/ndownloader/files/4765309)
Supplement: Supplementary file 1 [file 4765309]

## Supporting information

### Encapsulation of Small Molecules by a Cavitand Porphyrin Self-assembled via Quadruple Hydrogen Bonds

Jun Nakazawa, Maki Mizuki, Yuichi Shimazaki, Fumito Tani, and Yoshinori Naruta\*

*Institute for Materials Chemistry and Engineering, Kyushu University  
6-10-1 Higashi-ku, Fukuoka, Japan. E-mail: naruta@ms.ifoc.kyushu-u.ac.jp*

#### Experimental Section

##### Tetracarboxylcavitand•tetrapyridylporphyrin (**1•2**)

<sup>1</sup>H-NMR (400 MHz, 1,1,2,2-tetrachloroethane-*d*<sub>2</sub>) 16.20 (*s*, br, 4H, OH), 9.46 (*d*, 4H, 3-pyridyl), 8.66 (*s*, 8H, pyrrole  $\alpha$ -H), 8.41-8.32 (*m*, 4H, 6-pyridyl + 5-pyridyl), 8.05 (*t*, 4H, 4-pyridyl), 7.29-6.96 (*m*, 20H, CHCH<sub>2</sub>CH<sub>2</sub>C<sub>6</sub>H<sub>5</sub>), 6.60 (*s*, 4H, Ar-H meta to OCH<sub>2</sub>O), 4.96 (*d*, 4H, *J* = 7.8 Hz, outer OCH<sub>2</sub>O), 4.38 (*t*, 4H, *J* = 7.8 Hz, CHCH<sub>2</sub>CH<sub>2</sub>C<sub>6</sub>H<sub>5</sub>), 3.05 (*d*, 4H, *J* = 7.8 Hz, inner OCH<sub>2</sub>O), 2.40-2.16 (*m*, 16H, CHCH<sub>2</sub>CH<sub>2</sub>C<sub>6</sub>H<sub>5</sub>), -3.22 (*s*, 2H, NH); ESI-MS Found: *m/z* 1747.6. Calcd for C<sub>108</sub>H<sub>82</sub>N<sub>8</sub>O<sub>16</sub>: [M+H]<sup>+</sup> 1748.8.

##### Detection of host-guest complexation by <sup>1</sup>H and <sup>13</sup>C-NMR spectroscopy

**1•2** (4 mM) was dissolved in 1,1,2,2-tetrachloroethane-*d*<sub>2</sub> (0.5 mL) and the guest molecule was directly bubbled or added into a gas-tight NMR tube. <sup>1</sup>H NMR spectra were measured on a JEOL JNM-EX400 spectrometer at various guest concentrations (5~50 mM) at 298 K. The amounts of free and encapsulated guest molecules were determined by the integration of their proton signals relative to the host signals [**1•2**; at  $\delta$  = 9.46 ppm (4 protons)]. [free**1•2**] values were estimated from the amount of trapped guest molecules. The 1:1 binding constants were calculated according to the equation,  $K = [\text{Host} \cdot \text{Guest}] / ([\text{Host}_{\text{free}}][\text{Guest}_{\text{free}}])$ .

##### Measurement of exchange rates (2D-EXSY)

**1** (3.8 mM) and **2** (10 mM) were dissolved in 1,1,2,2-tetrachloroethane-*d*<sub>2</sub> (0.7 mL). Then, ethylene gas was directly bubbled in a gas-tight NMR tube (encapsulated ethylene = 3.4 mM, free ethylene = 8.1 mM). NOESY spectra were measured on a JEOL ECA-500 spectrometer (observed range: 1  $\pm$  5 ppm or 7  $\pm$  3 ppm, data points: 512 x 256, mixing time = 0.3 or 0 s, relaxation delay = 30 s, at 298 K). Exchange rates were obtained from cross- and diagonal-peak intensities using ExsyCalc software (MestReC). *T*<sub>1</sub> measurement was carried out for the same solution. Followings are obtained  $\tau$  values (sec): NH (**1•2**), 0.59; NH (**2**), 1.07; ethylene (encapsulated), 3.97; ethylene (free), 5.99; H<sub>i</sub> (**1•2**), 0.55; H<sub>o</sub> (**1•2**), 0.59; pyridine signals (**1•2**), 1.57 ~ 2.27; pyridine signals (**2**), 1.64 ~ 2.18; pyrrole- $\beta$  (**1•2**), 2.34; pyrrole- $\beta$  (**2**), 2.20.

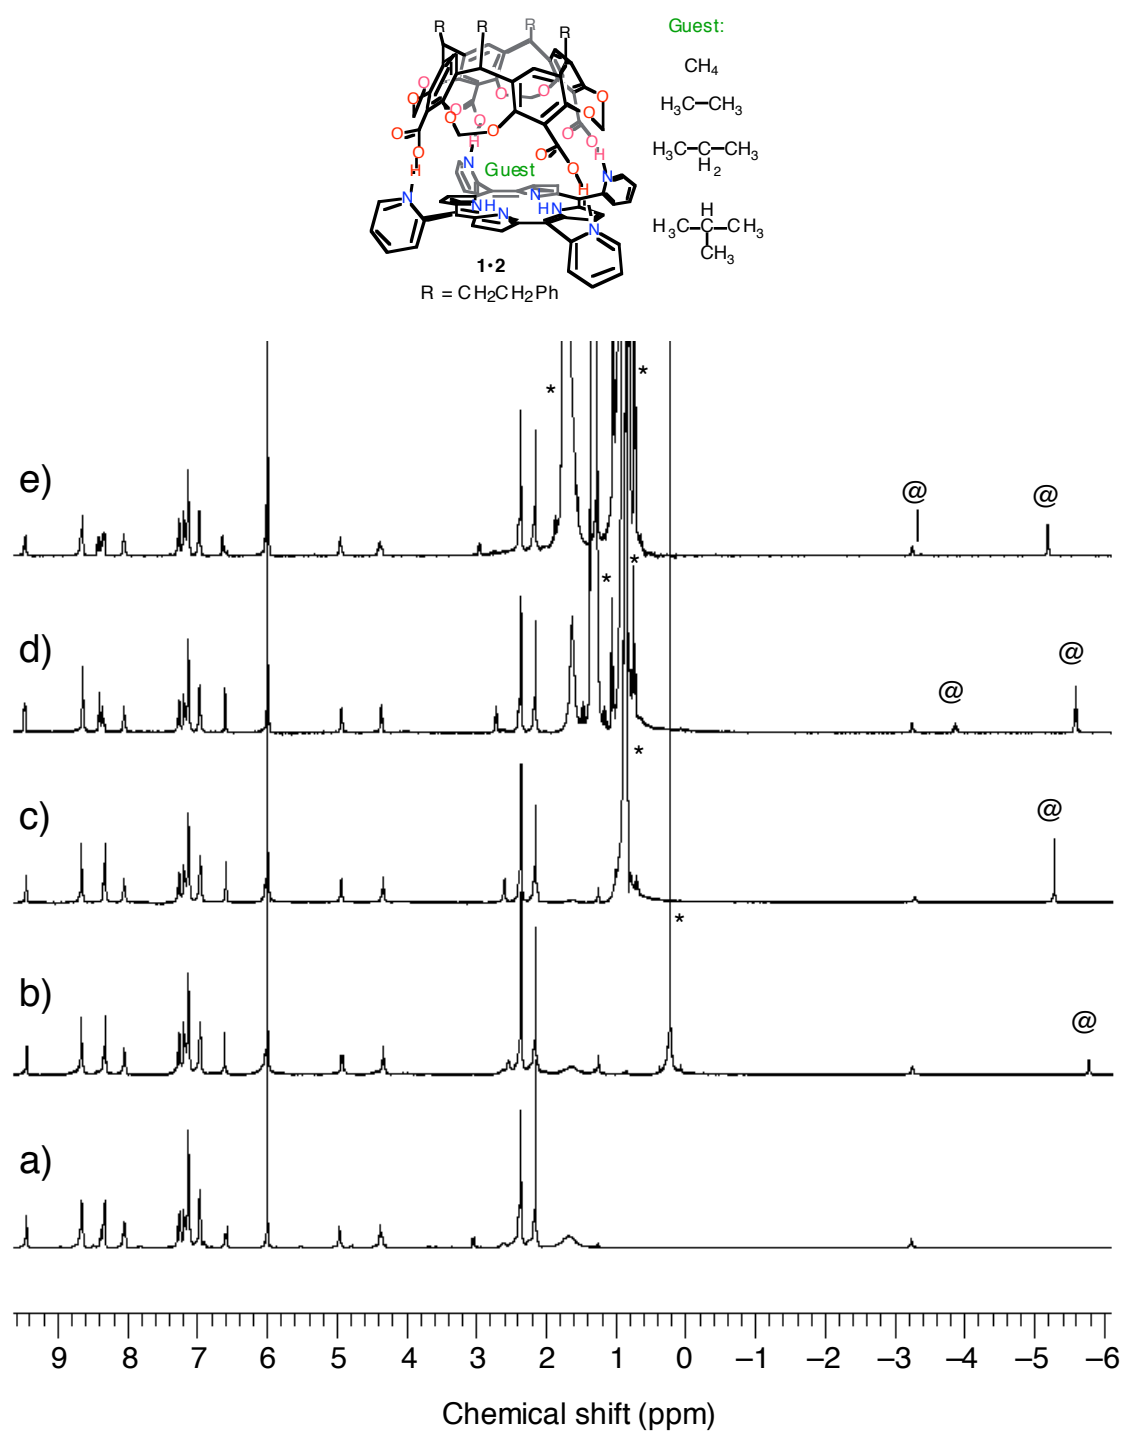

**Figure S1.**  $^1\text{H}$  NMR spectra of **1•2** (2 mM) with various hydrocarbons in  $1,1,2,2\text{-tetrachloroethane-}d_2$  at 298 K. a) **1•2**, b) with methane, c) with ethane, d) with propane, e) 2-methylpropane. \* denotes free hydrocarbons. @ denotes encapsulated guest signals.

**Table S1.**  $^1\text{H}$  NMR chemical shifts  $\delta$  (ppm)<sup>a</sup> of free and encapsulated guests in **1•2** in 1,1,2,2-tetrachloroethane- $d_2$  at 298 K.

| guest              | $\delta_{\text{free}}$           | $\delta_{\text{encapsulated}}$ |
|--------------------|----------------------------------|--------------------------------|
| methane            | 0.15                             | −5.76                          |
| acetylene          | 1.91                             | −4.51                          |
| ethylene           | 5.39                             | −0.80                          |
| ethane             | 0.85                             | −5.28                          |
| propane            | 1.31, 0.88                       | −3.81, −5.57                   |
| 2-methylpropane    | 1.72, 0.91                       | −4.34, −5.17                   |
| cyclopentane       | 1.52                             | −4.60                          |
| benzene            | 7.43                             | − <sup>b</sup>                 |
| cyclohexane        | 1.27, 0.89                       | − <sup>b</sup>                 |
| methanol           | 3.49, − <sup>c</sup>             | −3.13, − <sup>c</sup>          |
| ethanol            | 3.61, 1.14, − <sup>c</sup>       | −2.71, −4.80, −3.07            |
| 2-propanol         | 3.99, 1.19, − <sup>c</sup>       | −1.45, −5.28, − <sup>c</sup>   |
| 1-propanol         | 3.49, 1.53, 0.93, − <sup>c</sup> | − <sup>b</sup>                 |
| furan              | 7.50, 6.44                       | 1.45, 0.19                     |
| tetrahydrofuran    | 3.69, 1.82                       | −2.76, −4.28                   |
| 1,3-oxirane        | 4.88, 3.86                       | −1.18, −3.19                   |
| 1,3-oxirane-2-one  | 4.51                             | −2.95                          |
| 1,3,5-trioxirane   | 5.15                             | −1.03                          |
| dichloromethane    | 5.31                             | −0.47                          |
| chloroform         | 7.30                             | 1.23                           |
| dimethyl sulfide   | 3.34                             | −3.21                          |
| dimethyl sulfoxide | 2.57                             | −3.70                          |
| dimethyl disulfide | 2.43                             | −4.75                          |
| dimethyl sulfone   | 2.96                             | − <sup>b</sup>                 |
| acetonitrile       | 1.98                             | −3.42                          |
| propionitrile      | 2.32, 1.23                       | −3.44, −5.43                   |
| fumaronitrile      | 6.31                             | 0.87                           |
| acetone            | 2.10                             | −4.44                          |
| 2-butanone         | 2.42, 2.11, 1.01                 | − <sup>b</sup>                 |
| ethyl acetate      | 2.91, 2.83                       | − <sup>b</sup>                 |

[a] Chemical shifts were based on TMS. [b] Not encapsulated. [c] Signals of OH protons were not detected.

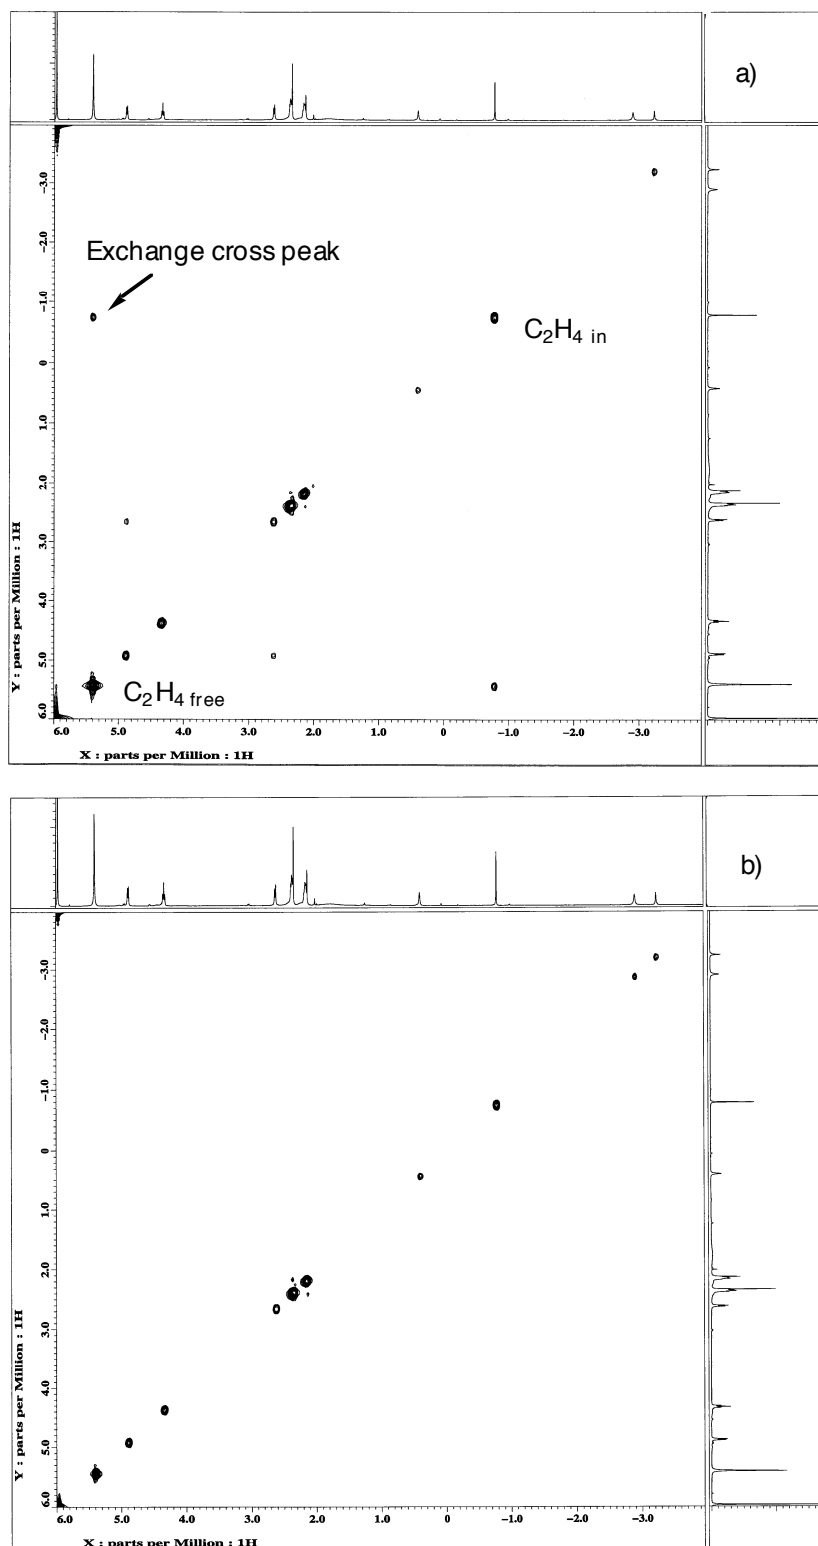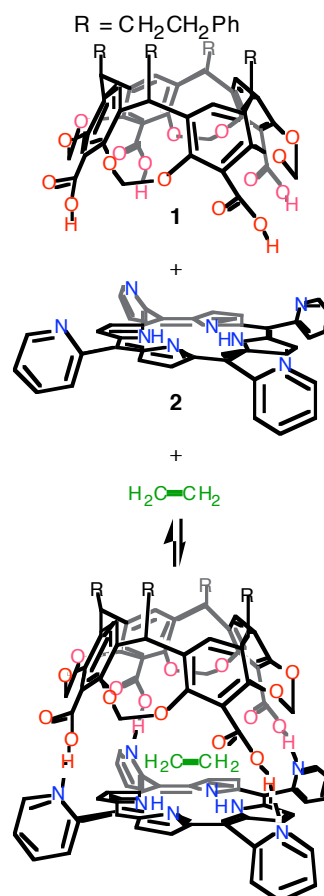

**Figure S2.** NOESY spectra of **1** (3.8 mM), **2** (10 mM) and ethylene (free 8.1 mM, encapsulated 3.4 mM) in tetrachloroethane- $d_2$  at 298 K. a)  $-4 \sim 6$  ppm, mixing time = 0.3 s, b)  $-4 \sim 6$  ppm mixing time = 0 s.

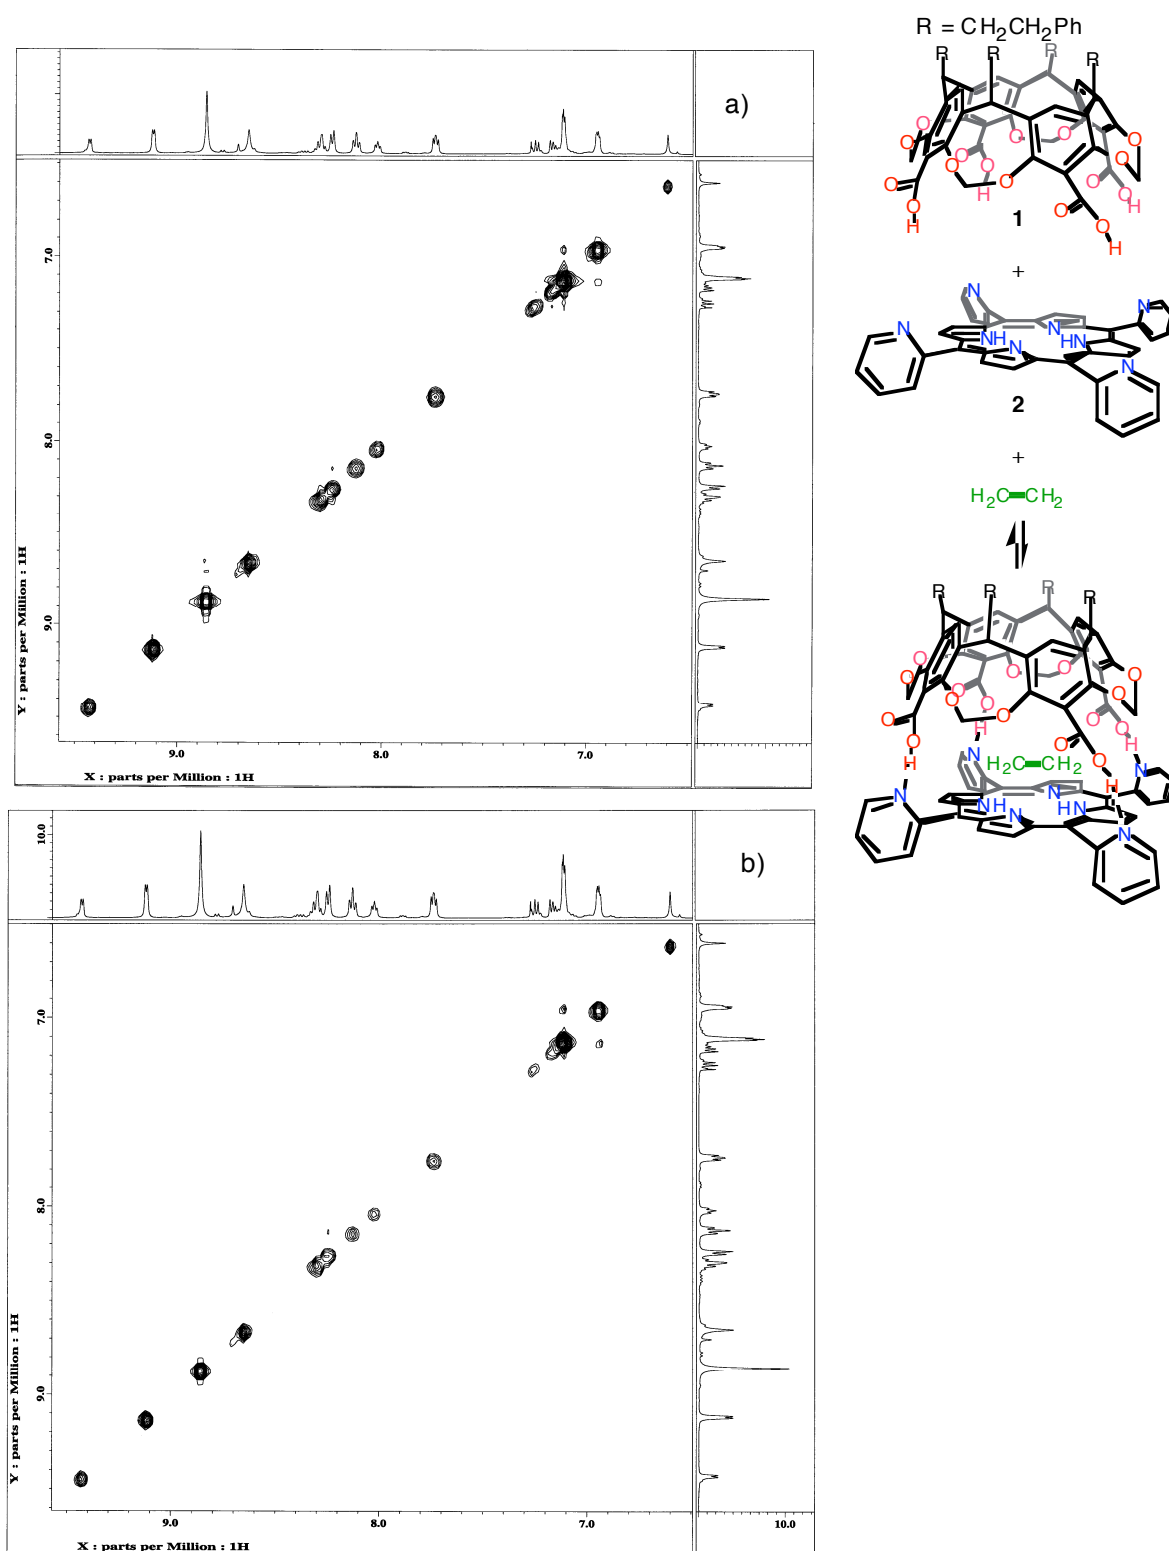

**Figure S3.** NOESY spectra of **1** (3.8 mM), **2** (10 mM) and ethylene (free 8.1 mM, encapsulated 3.4 mM) in tetrachloroethane- $d_2$  at 298 K. a) 6.5 ~ 9.5 ppm, mixing time = 0.3 s. b) 6.5 ~ 9.5 ppm, mixing time = 0 s.
